# Supplementary material
Source: Springer Nature journal article supplement (https://www.springermedizin.de/resource/supplementary/12245_2012_99_MOESM2_ESM.pdf/9672768)

# ROC Curve

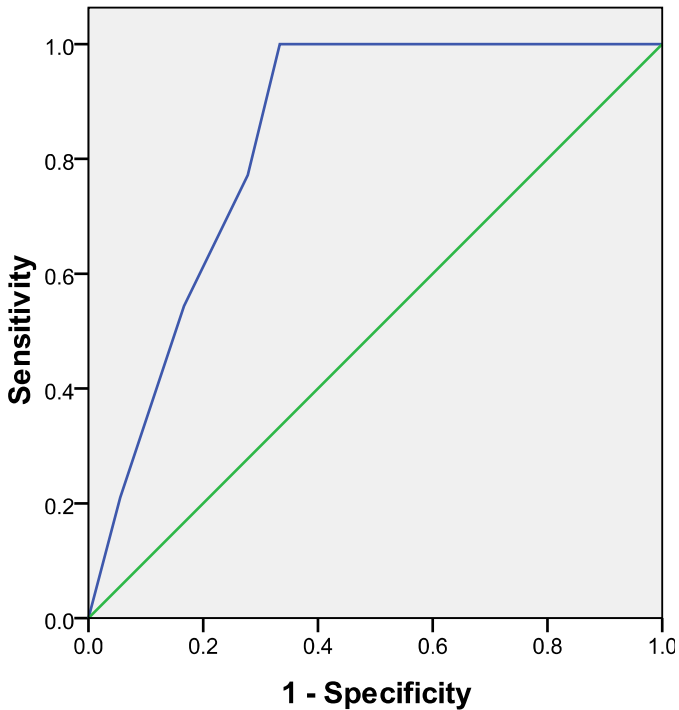

Supplement: MOESM2 [file 9672768]
